# Supplementary material for: Boosting Cu ion capture in high-salinity environments with amino-functionalized millispheres
Source: Royal Society of Chemistry journal article supplement (doi:10.1039/d4nr04517c), 2025-01-01
Supplement: d4nr04517c1.pdf [file d4nr04517c1.pdf]

Supporting Information

## Boosting Cu Ions Capture in High-Salinity Environments with Amino-Functionalized Millispheres

Jiaming Hu<sup>a</sup>, Jianheng Hong<sup>a</sup>, Weiting Yu<sup>b</sup>, Xiuzhen Wei<sup>a</sup>, and Meilan Pan<sup>a\*</sup>

<sup>a</sup> College of Environment, Zhejiang University of Technology, Hangzhou, Zhejiang 310014,  
China

<sup>b</sup> Shaoxing Research Institute, Zhejiang University of Technology, Shaoxing 312085, China

\* E-mail: [mlpan@zjut.edu.cn](mailto:mlpan@zjut.edu.cn).

## DLVO theory

Developed by Derjaguin and Landau, Verwey and Overbeek in 1940s, DLVO theory was employed to predict well adsorption performance caused by salinity<sup>1-3</sup>. This states that the colloid stability is related to the total interaction potential, which is the sum of attractive London-van der Waals energy ( $E_{vdW}$ ) and the electrostatic repulsion energy ( $E_{EDL}$ ) for charged colloidal particles:

$$E_{DLVO} = E_{vdW} + E_{EDL} \quad (1)$$

However, DLVO theory can be used to describe the adsorption of colloids on a surface. If the colloidal particles are approximately spherical and the surface of the adsorbent is assumed to be flat, the interaction between the particles and collectors can be described using sphere-plate DLVO energy profile. For a spherical particle interacting with a flat plate, the van der Waals energy is related to the separation distance as<sup>1, 2, 4, 5</sup>:

$$E_{vdW} = -\frac{A}{6} \left[ \frac{2R^2}{H_0(4R + H_0)} + \frac{2R^2}{(2R + H_0)^2} + \ln \frac{H_0(4R + H_0)}{(2R + H_0)^2} \right] \quad (2)$$

Where  $A$  is the Hamaker constant,  $R$  is the radius of the sphere, and  $H_0$  is the distance of closet point on the sphere surface from the flat plate.

The double layer force is evaluated from the swelling pressure acting between two charged plates, for which the linearized Poisson-Boltzmann equation is solved numerically. In a monovalent electrolyte, the electric potential  $\varphi(x)$  satisfies the equation:

$$\frac{d^2\varphi}{dx^2} = \frac{k^2}{\beta e} \sin H_0 \varphi \quad (3)$$

Where  $e$  is the elementary charge,  $\beta^{-1}=kT$  is the thermal energy. Thereby,  $k$  is the Boltzmann constant and  $T$  is the absolute temperature. The Debye parameter  $k$  is given

by:

$$k^2 = \frac{2\beta e^2 c}{\varepsilon_0 \varepsilon} \quad (4)$$

Where  $c$  is the concentration of the monovalent aqueous electrolyte,  $\varepsilon_0$  is the permittivity of vacuum, and  $\varepsilon$  is the dielectric constant of water. A temperature of 25 °C and  $\varepsilon = 80$  are being used. The Poisson-Boltzmann equation is solved between two plates situated at  $x = \pm H_0/2$  where  $h$  is the distance between the two plates numerically subject to the constant regulation boundary condition.

$$\pm \varepsilon_0 \varepsilon \frac{d\varphi}{dx} \Big|_{x = \pm H_0/2} = \sigma - C_I \left[ \varphi \left( \pm \frac{H_0}{2} \right) - \varphi_D \right] \quad (5)$$

Where  $\sigma$ ,  $\varphi_D$ , and  $C_I$  are the surface charge density, diffuse layer potential, and inner capacitance of the isolated surface. The surface charge density and the diffuse layer potential of the isolated surfaces are related by the Grahame relation:

$$\sigma = \frac{2\varepsilon_0 \varepsilon k}{\beta e} \sin H_0 \left( \frac{\beta e \varphi_D}{2} \right) \quad (6)$$

The interface is characterized by the regulation parameter:

$$p = \frac{C_D}{C_I + C_D} \quad (7)$$

Where  $C_D$  is the diffuse layer capacitance given by

$$C_D = \varepsilon_0 \varepsilon k \cos H_0 \left( \frac{\beta e \varphi_D}{2} \right) \quad (8)$$

Thereby, the constant regulation boundary condition is being used, which introduces a regulation parameter  $p$ . This parameter assumes simple values for the constant charge ( $p = 1$ ) and constant potential ( $p = 0$ ) boundary conditions. The independent parameters entering this model are thus the diffuse layer potential  $\varphi_D$ ,

regulation parameter  $p$ , and the electrolyte concentration  $c$ .

The double layer force is obtained by calculating the disjoining pressure originating from the double layer from the relation:

$$\Pi_{dl} = 2kTc[\cosh(\beta e\varphi) - 1] - \frac{1}{\varepsilon_0\varepsilon} \left(\frac{d\varphi}{dx}\right)^2$$

And subsequently one invokes a subsequent integration and the Derjaguin approximation

$$E_{EDL} = 2\pi R \int_h^\infty \Pi_{dl}(H_0') dH_0' \quad (9)$$

**Table S1.** BJH specific surface areas, average pore diameters, pore volumes, and pore size distributions of EDA@CMPS and CMPS.

| Adsorbents | Functional group    | BJH Specific Surface Area (m <sup>2</sup> /g) | Average Pore Diameter (nm) | BJH dV/dw pore distribution (%) |                  |                   |
|------------|---------------------|-----------------------------------------------|----------------------------|---------------------------------|------------------|-------------------|
|            |                     |                                               |                            | Micropore < 2 nm                | Mesopore 2~50 nm | Macropore > 50 nm |
| CMPS       | -CH <sub>2</sub> Cl | 30.15                                         | 26.45                      | 4.34                            | 82.62            | 13.04             |
| EDA@CMPS   | -NH <sub>2</sub>    | 39.40                                         | 25.65                      | 4.5                             | 81.81            | 13.69             |

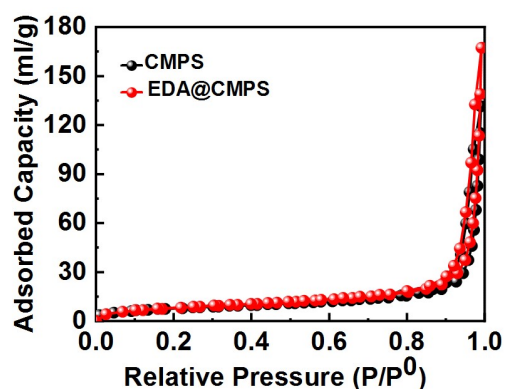

**Figure S1.** N<sub>2</sub> adsorption-desorption isotherm curves of CMPS and EDA@CMPS.

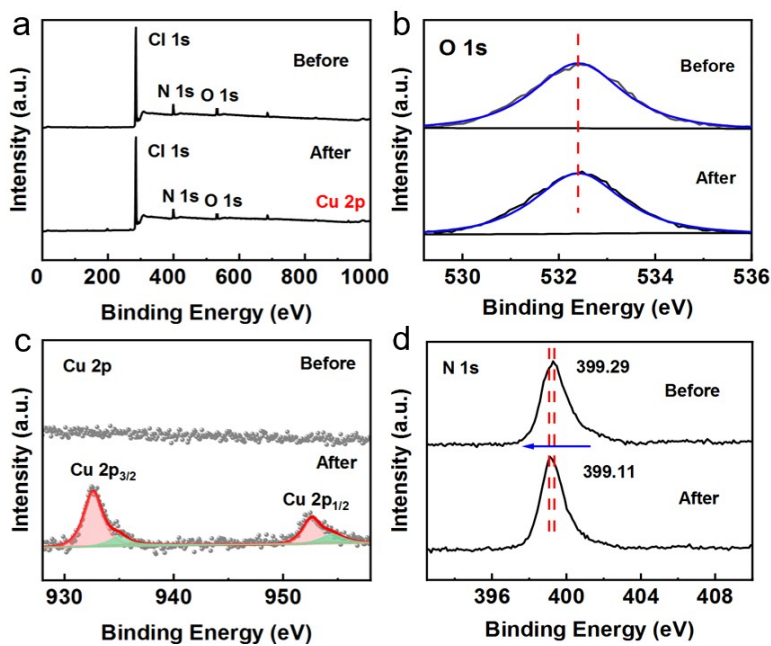

**Figure S2.** The XPS spectra (a) in O 1s (b), Cu 2p (c), and N 1s (d) before and after adsorption.

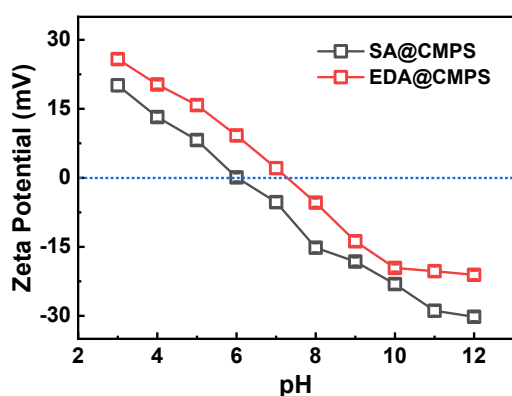

**Figure S3.** Zeta potential as a function of pH for SA@CMPS and EDA@CMPS.

**Table S2.** Kinetic parameters and intra-particle diffusion simulation for the adsorption of Cu<sup>2+</sup> on EDA@CMPS in saline solution and non-saline solution.

| [Cu:NaCl] | Pseudo-second-order model                        |                          |       | Intraparticle diffusion                            |                          |                                                    |                          |                                                    |                          |
|-----------|--------------------------------------------------|--------------------------|-------|----------------------------------------------------|--------------------------|----------------------------------------------------|--------------------------|----------------------------------------------------|--------------------------|
|           |                                                  |                          |       | First stage                                        |                          | Second stage                                       |                          | Third stage                                        |                          |
|           | $k_2$ ,<br>$\times 10^{-2}$<br>$\text{min}^{-1}$ | $Q_e$<br>$\text{mmol/g}$ | $R^2$ | $k_1$ ,<br>$\times 10^{-3}$<br>$\text{min}^{-0.5}$ | $C_1$<br>$\text{mmol/g}$ | $k_2$ ,<br>$\times 10^{-3}$<br>$\text{min}^{-0.5}$ | $C_2$<br>$\text{mmol/g}$ | $k_3$ ,<br>$\times 10^{-3}$<br>$\text{min}^{-0.5}$ | $C_3$<br>$\text{mmol/g}$ |
| 1:0       | 1.3                                              | 0.65                     | 0.992 | 0.8                                                | -0.04                    | 0.4                                                | 0.19                     | 0.056                                              | 0.50                     |
| 1:10      | 1.7                                              | 1.15                     | 0.997 | 1.4                                                | -0.06                    | 0.6                                                | 0.39                     | 0.076                                              | 0.90                     |

**Table S3.** Thermodynamic parameters of Cu(II) removal by EDA@CMPS.

| [Cu : NaCl] | Temperature,<br>K | $\Delta G$<br>(kJ/mol) | $\Delta H$<br>(kJ/mol) | $\Delta S$<br>(J/mol·K) | $T\Delta S$<br>(J/mol) |
|-------------|-------------------|------------------------|------------------------|-------------------------|------------------------|
| <b>1:0</b>  | 283               | -15.92                 |                        |                         | 30.16                  |
|             | 298               | -17.61                 | 14.20                  | 106.56                  | 31.75                  |
|             | 313               | -19.11                 |                        |                         | <b>33.35</b>           |
| <b>1:10</b> | 283               | -19.21                 |                        |                         | 37.03                  |
|             | 298               | -21.87                 | 17.60                  | 130.86                  | 38.99                  |
|             | 313               | -23.09                 |                        |                         | 40.96                  |

**Table S4.** Zeta potentials of EDA+Cu(II) in different salinity.

| Samples                | Zeta potential, mV |
|------------------------|--------------------|
| EDA+Cu(II)             | -44.48             |
| EDA+Cu(II)+5 mM NaCl   | -35.1              |
| EDA+Cu(II)+25 mM NaCl  | -15.2              |
| EDA+Cu(II)+50 mM NaCl  | -10.1              |
| EDA+Cu(II)+100 mM NaCl | -2.18              |
| EDA+Cu(II)+500 mM NaCl | 0.08               |

1. Trinh, T. A.; Han, Q.; Ma, Y.; Chew, J. W., Microfiltration of oil emulsions stabilized by different surfactants. *Journal of membrane science* **2019**, *579*, 199-209.
2. Tanudjaja, H. J.; Chew, J. W., Assessment of oil fouling by oil-membrane interaction energy analysis. *Journal of Membrane Science* **2018**, *560*, 21-29.
3. Chew, J. W.; Kilduff, J.; Belfort, G., The behavior of suspensions and macromolecular solutions in crossflow microfiltration: An update. *Journal of Membrane Science* **2020**, *601*, 117865.
4. Brant, J. A.; Childress, A. E., Assessing short-range membrane–colloid interactions using surface energetics. *Journal of Membrane Science* **2002**, *203*, (1-2), 257-273.
5. Van Oss, C. J., *Interfacial forces in aqueous media*. CRC press: 2006.
